# Supplementary material for: Thienopyrrole and selenophenopyrrole donor fused with benzotriazole acceptor: microwave assisted synthesis and electrochemical polymerization
Source: Royal Society of Chemistry journal article supplement (doi:10.1039/c4ra14850a), 2014-12-04
Supplement: c4ra14850a1.pdf [file c4ra14850a1.pdf]

## Supporting Information

# Thienopyrrole and Selenophenopyrrole Donor Fused with Benzotriazole Acceptor: Microwave Assisted Synthesis and Electrochemical Polymerization

Sirina Ghosh, Anjan Bedi and Sanjio S. Zade\*

*Department of Chemical Sciences, Indian Institute of Science Education and Research (IISER)*

*Kolkata, Mohanpur 741246, India.*

[\*] email: [sanjiozade@iiserkol.ac.in](mailto:sanjiozade@iiserkol.ac.in)

### Table of Contents

|   |                                                                                                          |         |
|---|----------------------------------------------------------------------------------------------------------|---------|
| 1 | <b>Table 1.</b> Crystallographic data and structure refinement parameters.                               | S2      |
| 2 | <b>Figure S1, S2.</b> Interplanar distance and packing in <b>4</b> and <b>5</b> .                        | S3      |
| 3 | <b>Figure S3.</b> Solution state absorption spectra of compound (a) <b>6</b> and compound (b) <b>7</b> . | S4      |
| 4 | <b>Figure S4.</b> Linear increase in current with the scan rate for (a) <b>6</b> and (b) <b>7</b> .      | S4      |
| 5 | <b>Figure S5.</b> CV and electrochemical polymerization of <b>4</b> and <b>5</b> .                       | S5      |
| 5 | <b>Figure S6, S7.</b> (a) HOMO, (b) LUMO for <b>6</b> , <b>7</b> , <b>P6</b> and <b>P7</b> .             | S6      |
| 6 | <b>Table S2.</b> Optimized structures of <b>6</b> and <b>7</b> .                                         | S7      |
| 7 | <b>Figure 8-17.</b> <sup>1</sup> H and <sup>13</sup> C NMR spectra of <b>3-7</b> .                       | S7-S11  |
| 8 | Coordinates for optimized geometry                                                                       | S11-S15 |

**Table 1.** Crystallographic data and structure refinement parameters.

|                       |                                                                                                             |                                                                                                              |                                                               |                                                                |
|-----------------------|-------------------------------------------------------------------------------------------------------------|--------------------------------------------------------------------------------------------------------------|---------------------------------------------------------------|----------------------------------------------------------------|
| Formula               | C <sub>20</sub> H <sub>19</sub> N <sub>5</sub> S <sub>2</sub> .C <sub>4</sub> H <sub>8</sub> O <sub>2</sub> | C <sub>20</sub> H <sub>19</sub> N <sub>5</sub> Se <sub>2</sub> .C <sub>4</sub> H <sub>8</sub> O <sub>2</sub> | C <sub>22</sub> H <sub>23</sub> N <sub>5</sub> S <sub>2</sub> | C <sub>22</sub> H <sub>23</sub> N <sub>5</sub> Se <sub>2</sub> |
| Crystal system        | Monoclinic                                                                                                  | Monoclinic                                                                                                   | Monoclinic                                                    | Monoclinic                                                     |
| space group           | P 1 21/c 1                                                                                                  | P21/c                                                                                                        | P 21/n                                                        | P 1 21/n 1                                                     |
| a [Å]                 | 7.3225(2)                                                                                                   | 7.2332(3)                                                                                                    | 9.5446(4)                                                     | 9.5962(4)                                                      |
| b [Å]                 | 15.3272(5)                                                                                                  | 15.9927(6)                                                                                                   | 14.8256(5)                                                    | 14.5492(5)                                                     |
| c [Å]                 | 21.4586(6)                                                                                                  | 21.3756(8)                                                                                                   | 15.3905(6)                                                    | 15.4086(6)                                                     |
| α [deg]               | 90                                                                                                          | 90.00                                                                                                        | 90.00                                                         | 90                                                             |
| β [deg]               | 94.056(3)                                                                                                   | 95.932(3)                                                                                                    | 102.452(4)                                                    | 102.721(4)                                                     |
| γ [deg]               | 90                                                                                                          | 90.00                                                                                                        | 90.00                                                         | 90                                                             |
| V [Å <sup>3</sup> ]   | 2402.34(12)                                                                                                 | 2459.45(17)                                                                                                  | 2126.61(14)                                                   | 2098.50(14)                                                    |
| Z                     | 4                                                                                                           | 4                                                                                                            | 4                                                             | 4                                                              |
| λ [Å]                 | 0.71073                                                                                                     | 1.54184                                                                                                      | 0.71073                                                       | 0.71073                                                        |
| ρ <sub>calcd</sub>    | 1.3316                                                                                                      | 1.554                                                                                                        | 1.317                                                         | 1.6312                                                         |
| F[000]                | 1017.3545                                                                                                   | 1160                                                                                                         | 888                                                           | 1031.6812                                                      |
| μ [mm <sup>-1</sup> ] | 0.253                                                                                                       | 4.009                                                                                                        | 0.269                                                         | 3.543                                                          |
| θ [deg]               | 3.09-27.97                                                                                                  | 3.4550-66.3150                                                                                               | 1.93-28.22                                                    | 2.2950- 28.0090                                                |
| index ranges          | -5 ≤ h ≤ 8<br>-20 ≤ k ≤ 19<br>-25 ≤ l ≤ 28                                                                  | -8 ≤ h ≤ 6<br>-18 ≤ k ≤ 18<br>-25 ≤ l ≤ 24                                                                   | -11 ≤ h ≤ 12<br>-18 ≤ k ≤ 7<br>-20 ≤ l ≤ 9                    | -12 ≤ h ≤ 7<br>-19 ≤ k ≤ 12<br>-20 ≤ l ≤ 20                    |
| T [K]                 | 293.15                                                                                                      | 100.03(10)                                                                                                   | 293(2)                                                        | 99.98(10)                                                      |
| R1                    | 0.066472                                                                                                    | 0.0418                                                                                                       | 0.0591                                                        | 0.045370                                                       |
| wR2                   | 0.0944                                                                                                      | 0.1060                                                                                                       | 0.1384                                                        | 0.1143                                                         |
| Rmerge                | 0.086986                                                                                                    | 0.0439                                                                                                       | 0.0895                                                        | 0.059614                                                       |
| parameters            | 143                                                                                                         | 301                                                                                                          | 265                                                           | 264                                                            |
| GOF                   | 1.164225                                                                                                    | 1.104                                                                                                        | 1.068                                                         | 1.142507                                                       |
| reflns total          | 9430                                                                                                        | 9009                                                                                                         | 7193                                                          | 8088                                                           |
| unique reflns         | 4852                                                                                                        | 4273                                                                                                         | 4595                                                          | 4595                                                           |
| obsd reflns           | 3697                                                                                                        | 4015                                                                                                         | 3049                                                          | 3710                                                           |
| CCDC No.              | 1021387                                                                                                     | 1021388                                                                                                      | 999722                                                        | 1021386                                                        |

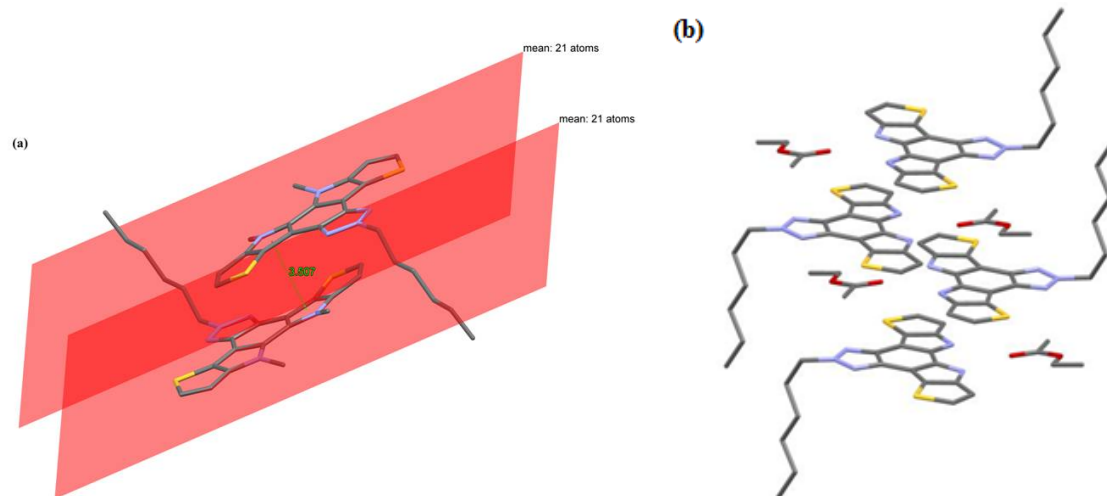

**Figure S1.** (a) Interplanar distance (by picking only the atoms of the rings) between two molecules of **6**. (b) Arrangement of neighboring molecules in the crystal packing of **4**.

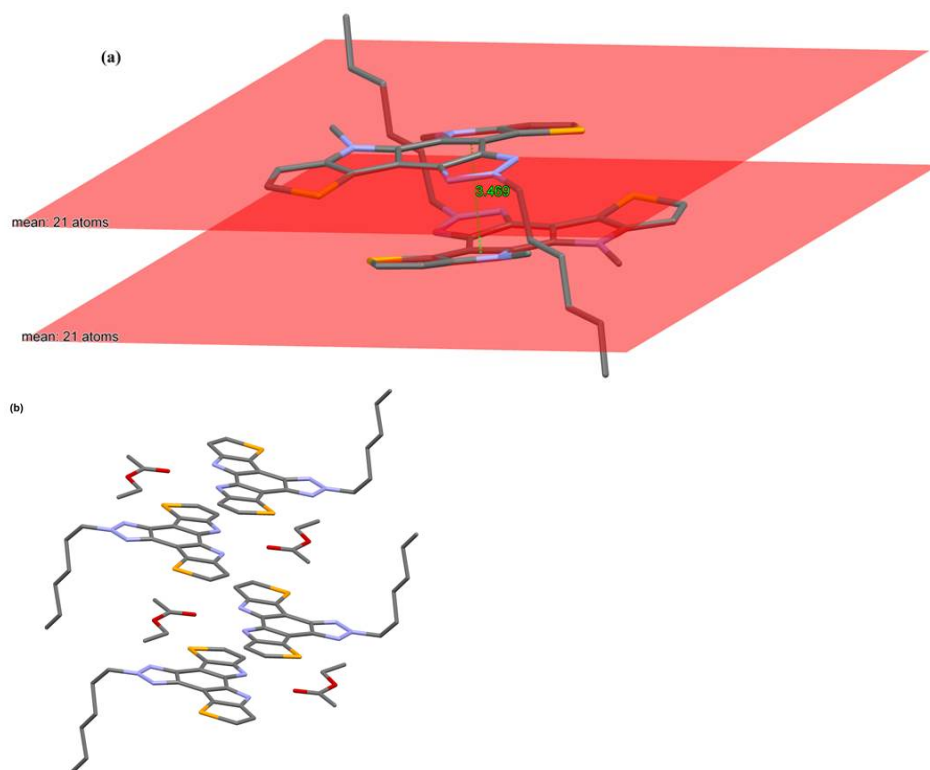

**Figure S2.** (a) Interplanar distance (by picking only the atoms of the rings) between two molecules of **7**. (b) Arrangement of neighboring molecules in the crystal packing of **5**.

## UV-vis and fluorescence spectra

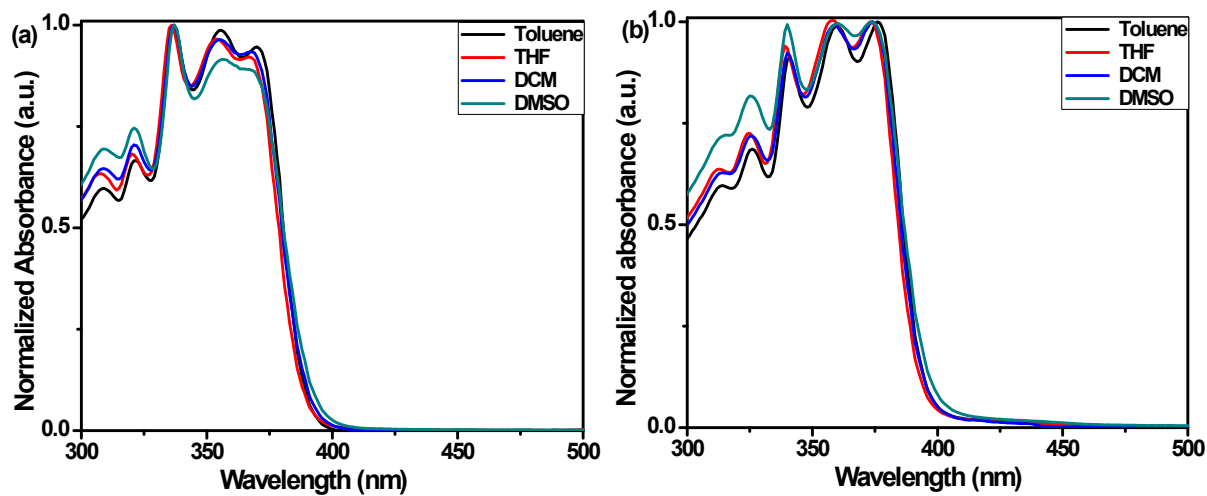

Figure S3. Solution state absorption spectra of compound (a) 6 and compound (b) 7.

## Scan rate dependence of polymer

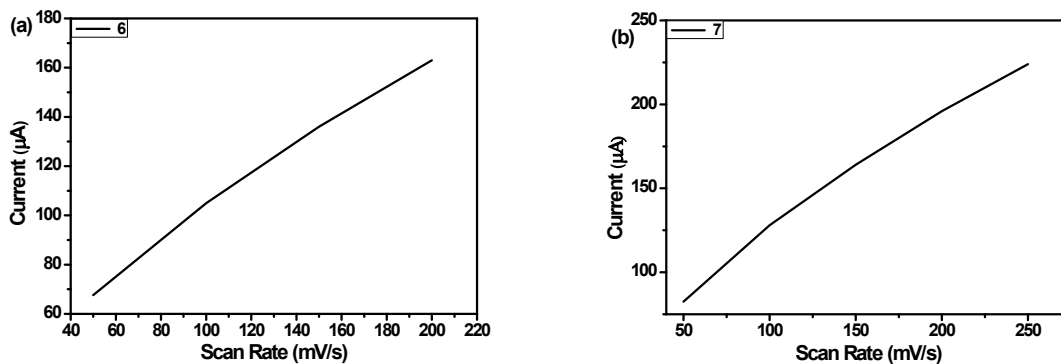

Figure S4. Linear increase in current with the scan rate for (a) 6 and (b) 7.

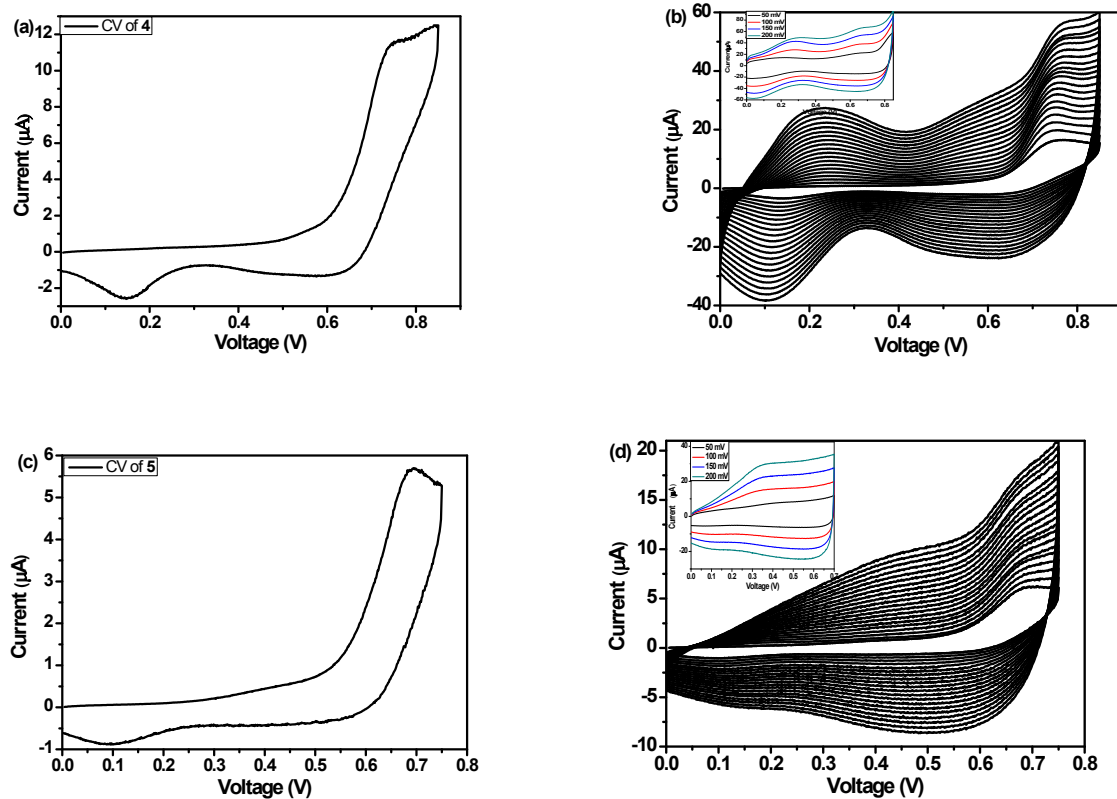

**Figure S5.** CV of (a) **4** and (c) **5** in ACN and 0.1 M TBAPC on a Pt electrode at a scan rate of 50 mV/s vs Ag/AgCl wire. Multisweep electrochemical polymerization of (b) **4** and (d) **5** on a Pt electrode in ACN and 0.1 M TBAPC at a scan rate of 50 mV/s vs Ag/AgCl wire. (Inset) CV of (b) **P4** and (d) **P5** produced in monomer free ACN and 0.1 M TBAPC as a function of scan rate.

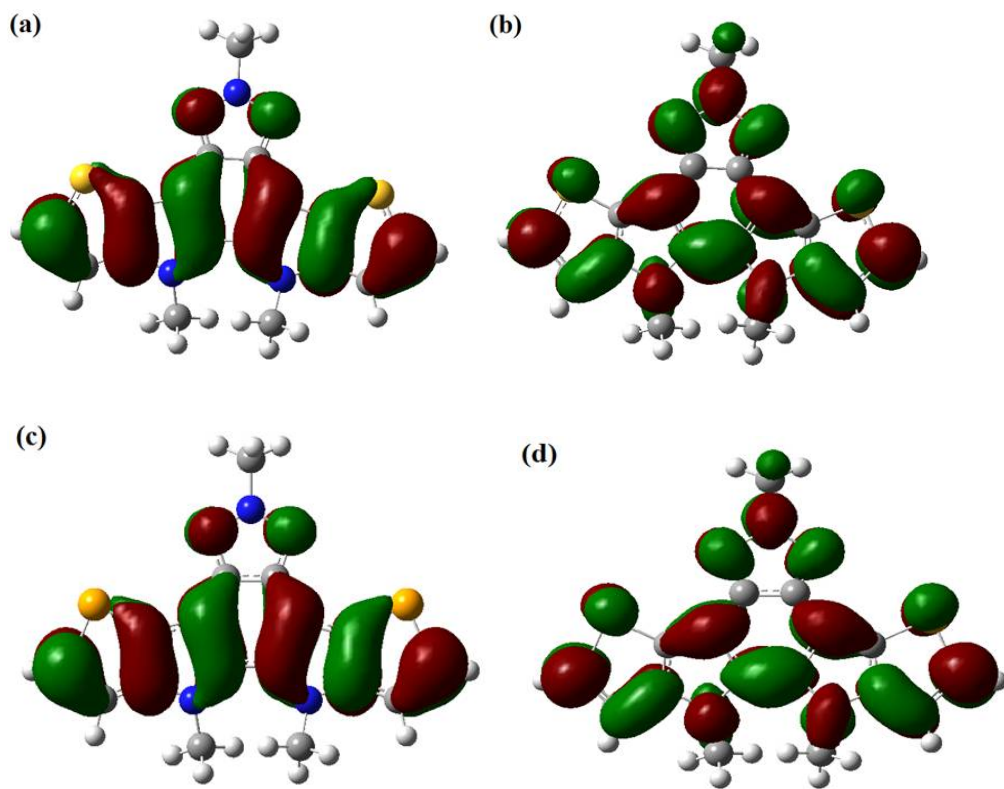

**Figure S6.** (a) HOMO, (b) LUMO for **6**; (c) HOMO and (d) LUMO for **7**.

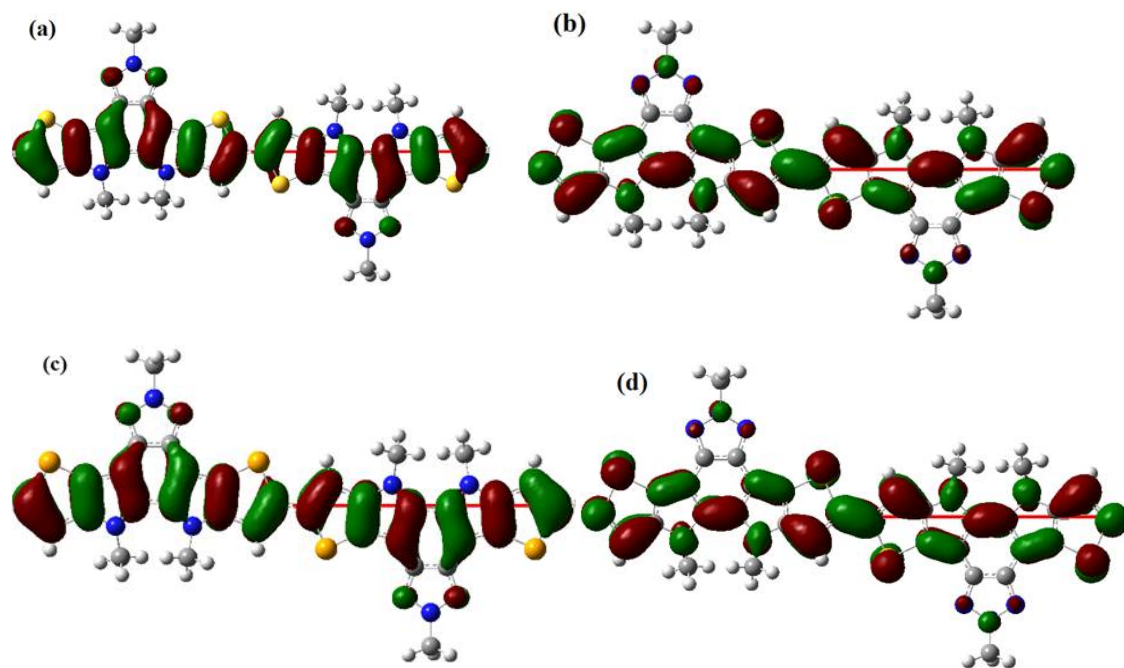

**Figure S7.** (a) HOMO, (b) LUMO for **P6**; (c) HOMO and (d) LUMO for **P7**.

**Table S2.** Optimized structures of **6** and **7**.

| Monomer  | Top View                                                                          | Side View                                                                          | HOMO (eV) | LUMO (eV) |
|----------|-----------------------------------------------------------------------------------|------------------------------------------------------------------------------------|-----------|-----------|
| <b>6</b> | 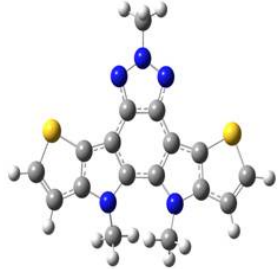 |  | -4.72     | -1.00     |
| <b>7</b> |  |  | -4.69     | -1.01     |

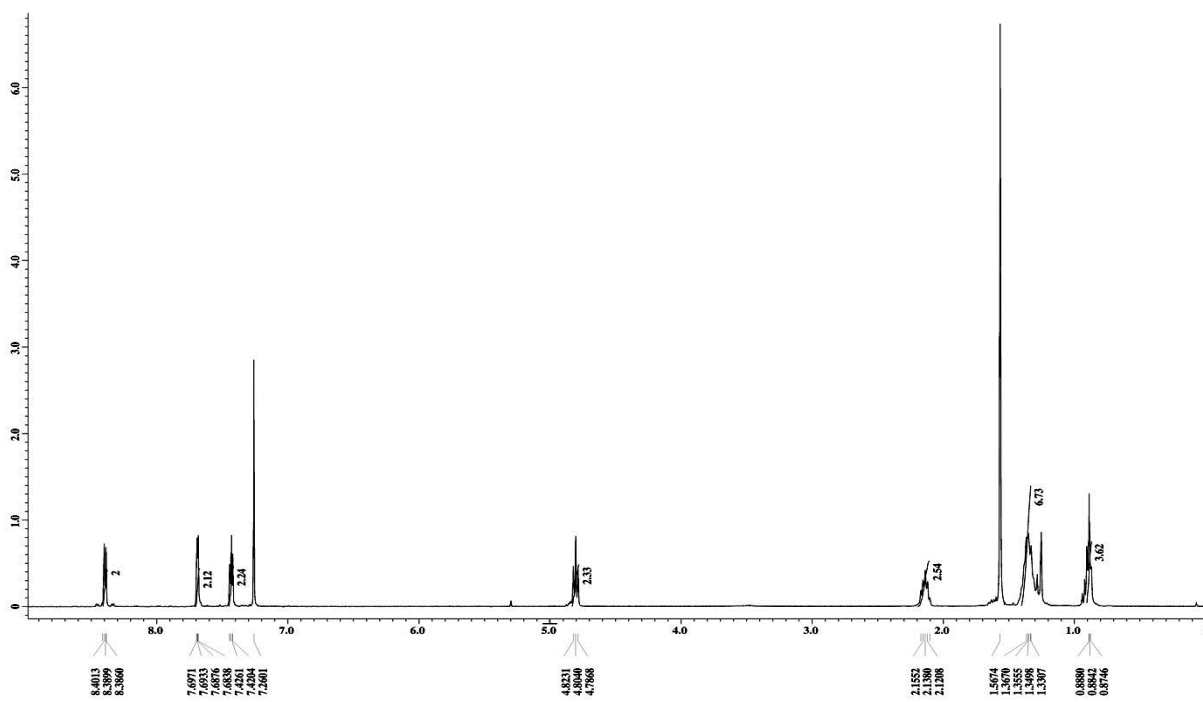

**Figure S8.**  $^1\text{H}$  NMR of compound **3**.

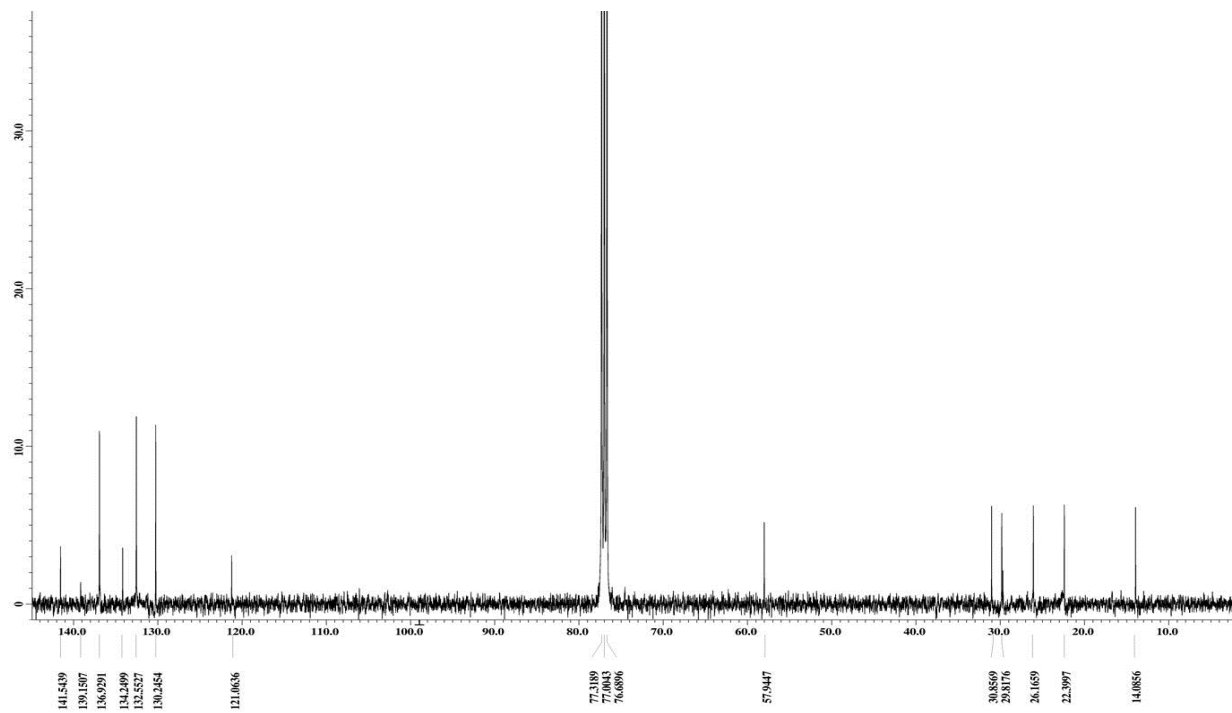

Figure S9.  $^{13}\text{C}$  NMR of compound 3.

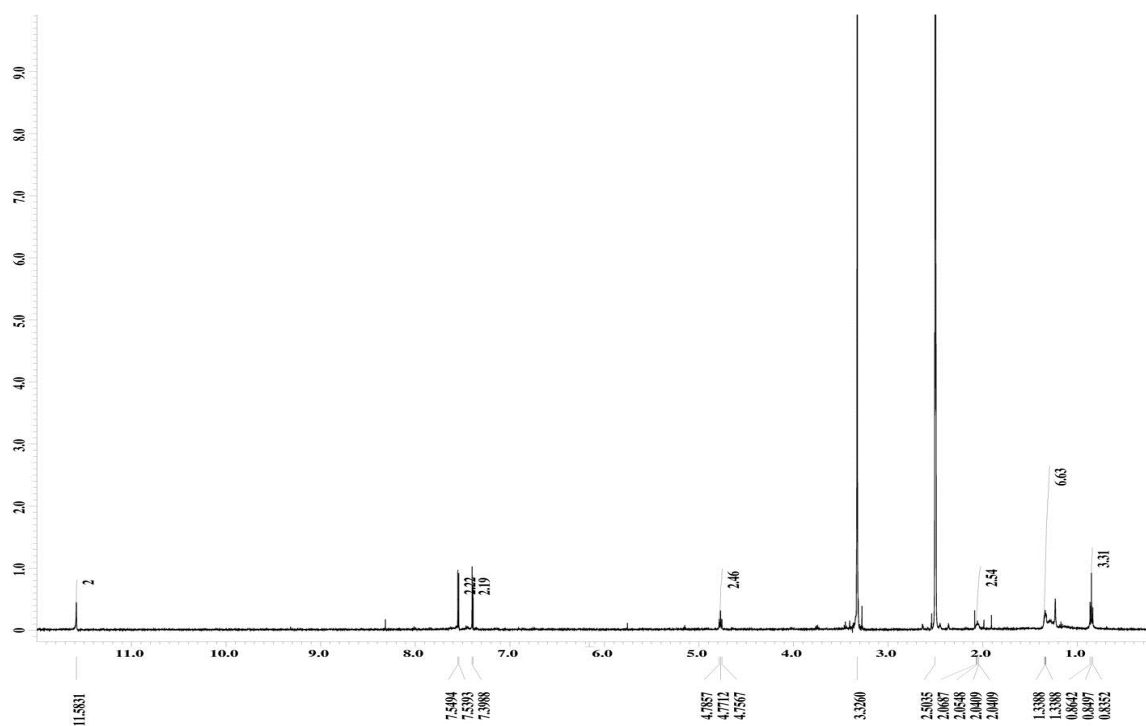

Figure S10.  $^1\text{H}$  NMR of compound 4.



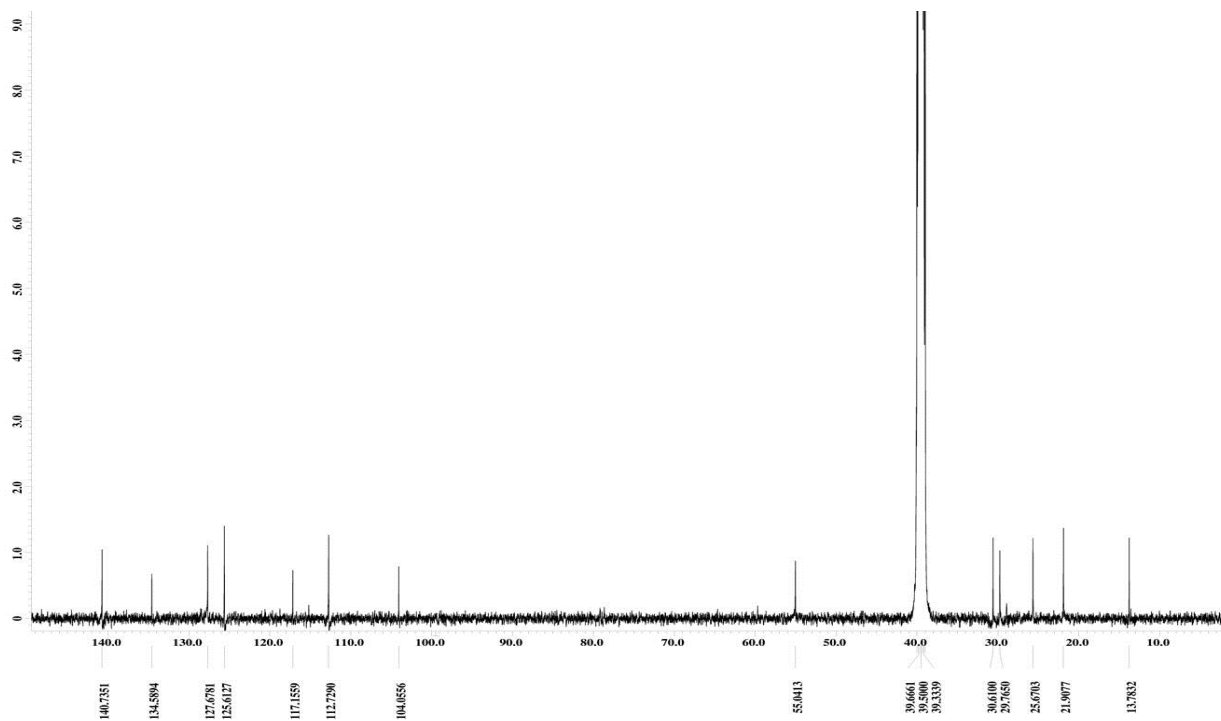

Figure S11.  $^{13}\text{C}$  NMR of compound 4.

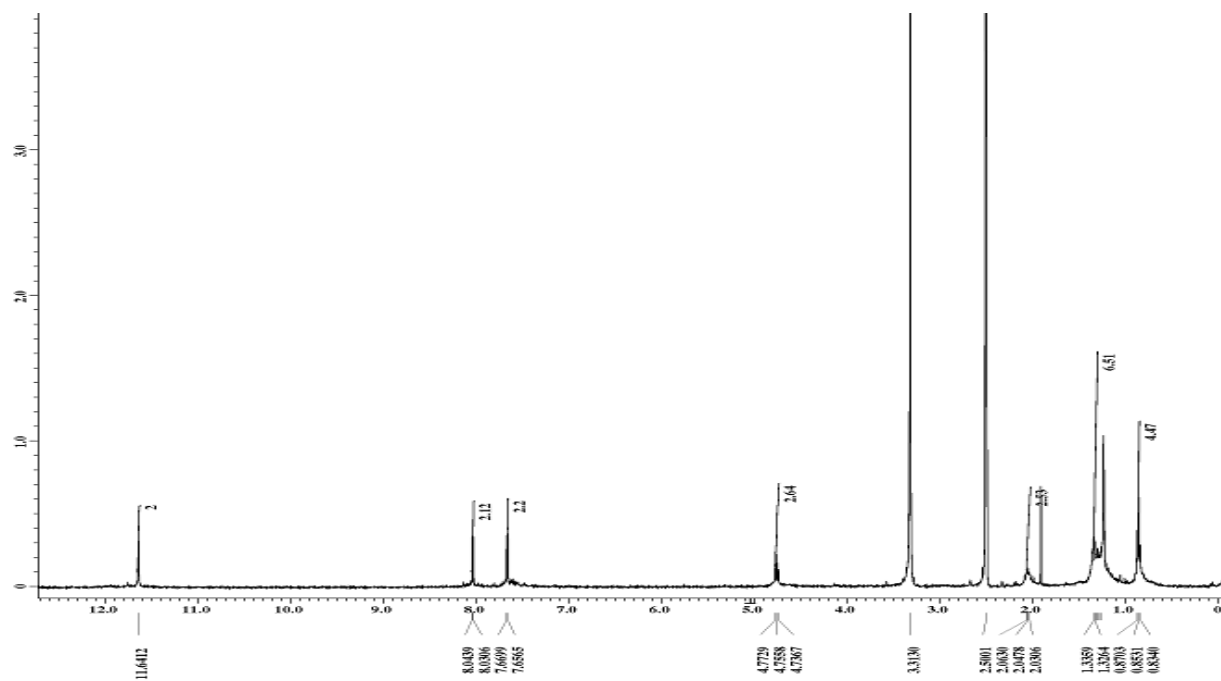

Figure S12.  $^1\text{H}$  NMR of compound 5.

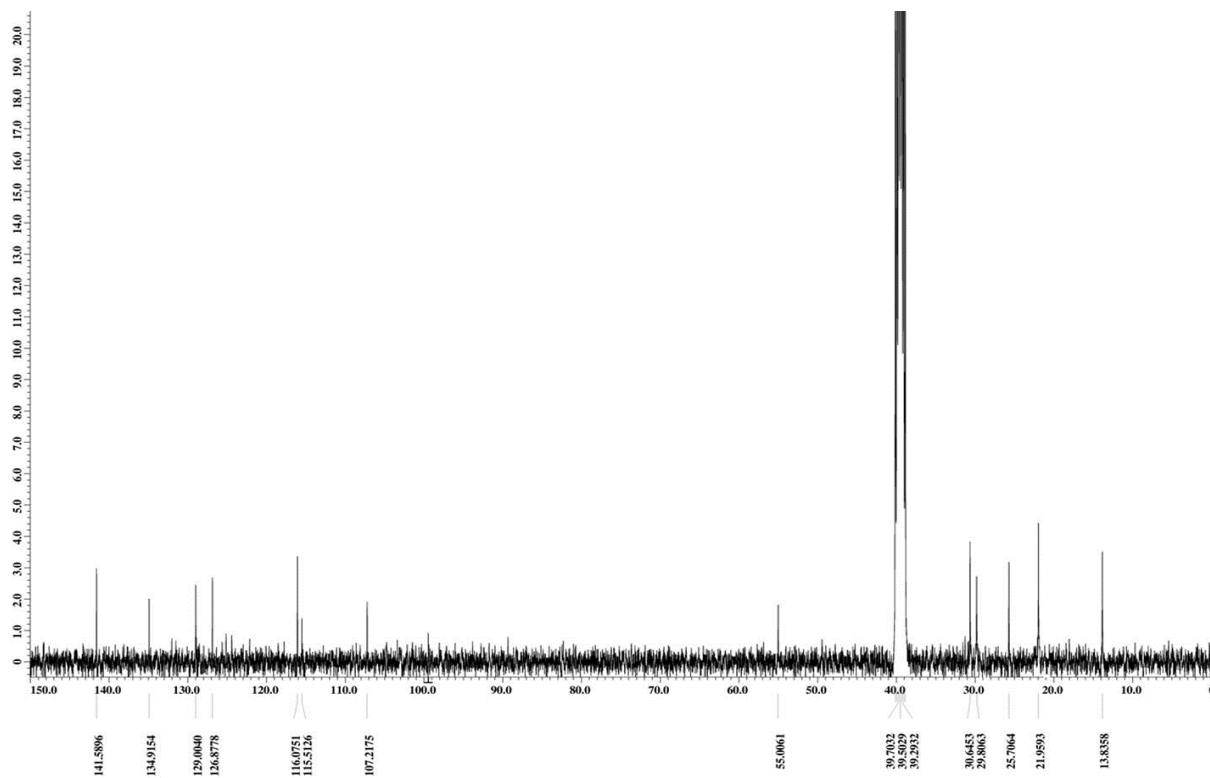

Figure S13.  $^{13}\text{C}$  NMR of compound 5.

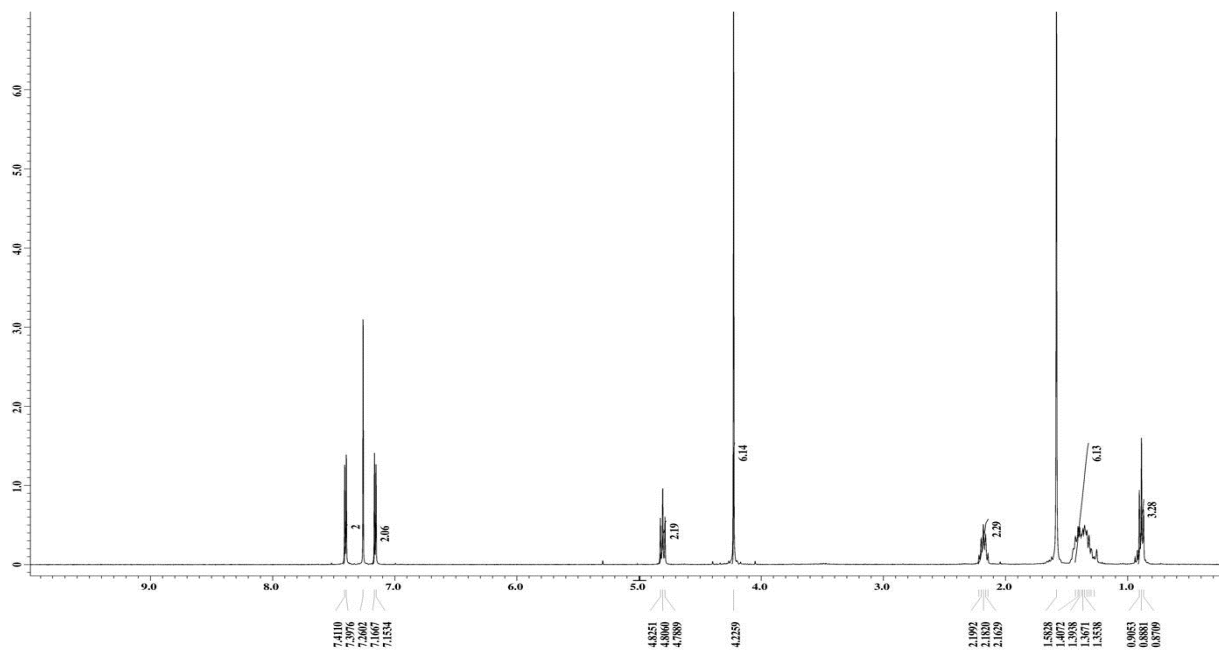

Figure S14.  $^1\text{H}$  NMR of compound 6.

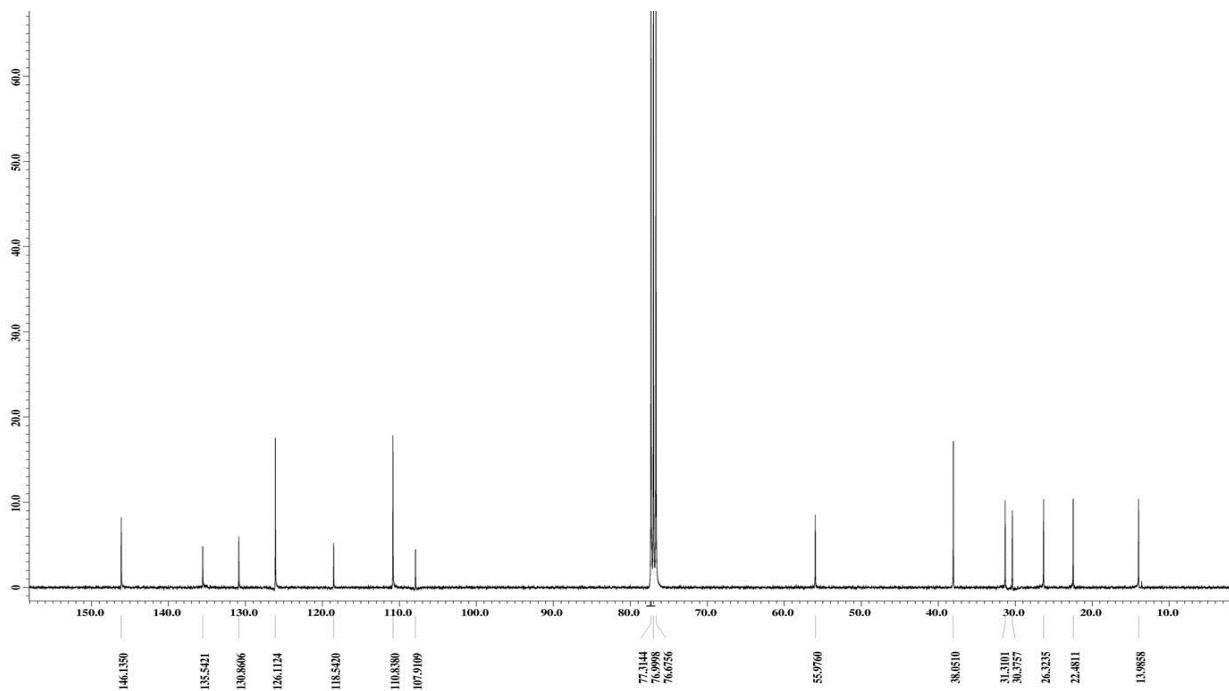

Figure S15.  $^{13}\text{C}$  NMR of compound 6.

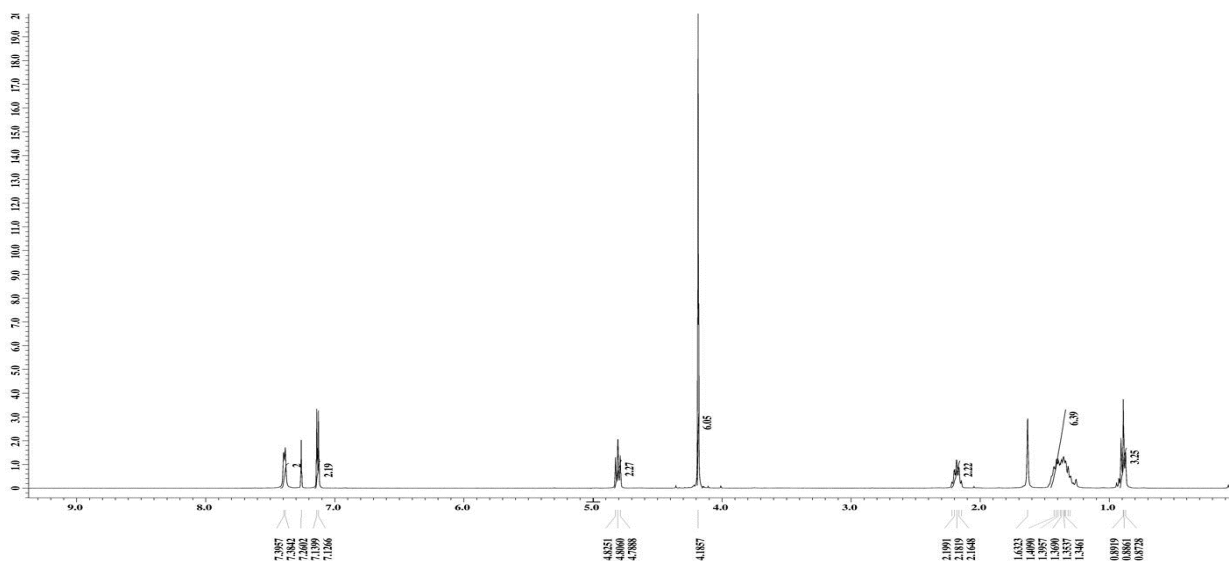

Figure S16.  $^1\text{H}$  NMR of compound 7.

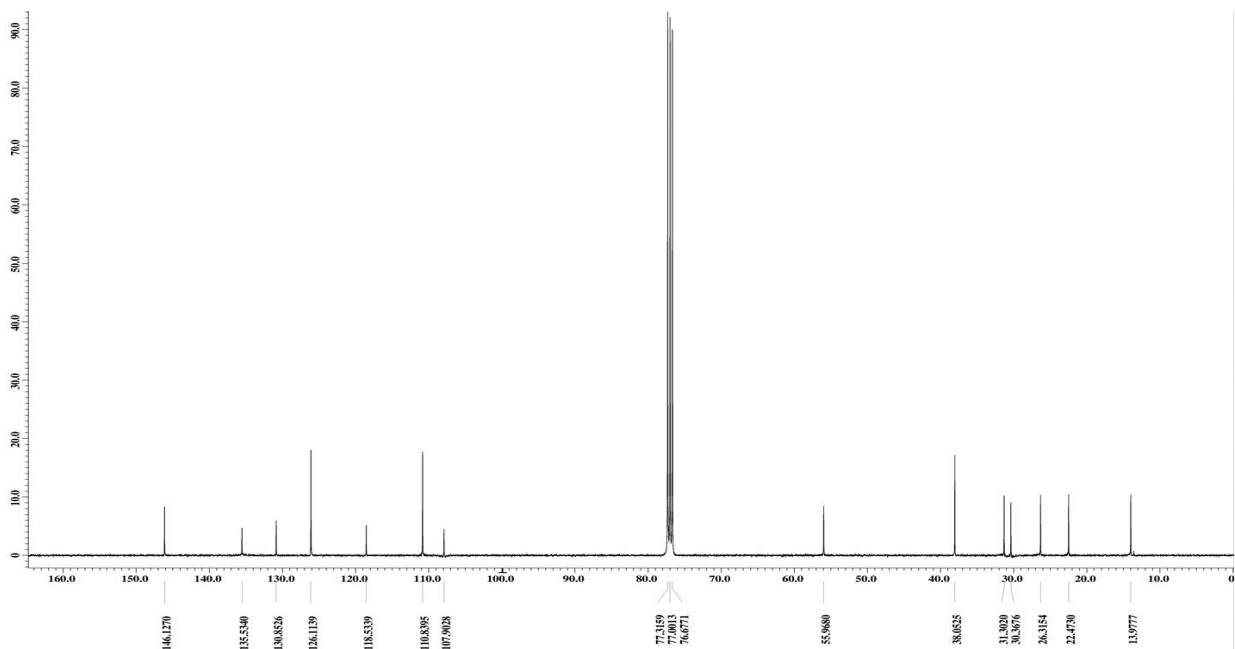

**Figure S17.**  $^{13}\text{C}$  NMR of compound **7**.

## Reference

T. L. Tam, H. Li, Y. M. Lam, S. G. Mhaisalkar and A. C. Grimsdale, *Org. Lett.*, 2011, **13**, 4613.

## Coordinates for optimized geometry

### 6

| Center Number | Atomic Number | Atomic Type | Coordinates (Angstroms) |           |           |
|---------------|---------------|-------------|-------------------------|-----------|-----------|
|               |               |             | X                       | Y         | Z         |
| 1             | 7             | 0           | 1.133492                | 2.831711  | -0.124909 |
| 2             | 7             | 0           | -1.133939               | 2.832765  | 0.097281  |
| 3             | 7             | 0           | -0.001169               | 3.526997  | -0.026602 |
| 4             | 16            | 0           | 4.382166                | 0.721874  | -0.159349 |
| 5             | 16            | 0           | -4.382454               | 0.724836  | 0.146267  |
| 6             | 7             | 0           | 1.635056                | -1.945685 | 0.099189  |
| 7             | 7             | 0           | -1.636272               | -1.945656 | -0.090545 |
| 8             | 6             | 0           | 5.138738                | -0.852914 | 0.006244  |
| 9             | 1             | 0           | 6.218369                | -0.920269 | 0.008480  |
| 10            | 6             | 0           | -5.139530               | -0.850629 | -0.010278 |
| 11            | 1             | 0           | -6.219188               | -0.917495 | -0.013839 |
| 12            | 6             | 0           | 4.242005                | -1.885106 | 0.094984  |
| 13            | 1             | 0           | 4.532094                | -2.925372 | 0.189454  |
| 14            | 6             | 0           | -4.243159               | -1.883816 | -0.091074 |
| 15            | 1             | 0           | -4.533590               | -2.924531 | -0.179306 |
| 16            | 6             | 0           | -2.809271               | -0.011334 | 0.099568  |
| 17            | 6             | 0           | -2.908279               | -1.392737 | -0.022831 |
| 18            | 6             | 0           | -0.716170               | -0.890448 | -0.004390 |
| 19            | 6             | 0           | -1.433039               | 0.333669  | 0.087250  |
| 20            | 6             | 0           | 0.715330                | -0.890628 | 0.007454  |

|    |   |   |           |           |           |
|----|---|---|-----------|-----------|-----------|
| 21 | 6 | 0 | 1.432616  | 0.332586  | -0.093016 |
| 22 | 6 | 0 | 2.808707  | -0.013176 | -0.105354 |
| 23 | 6 | 0 | 2.907251  | -1.393837 | 0.025721  |
| 24 | 6 | 0 | 0.707430  | 1.556419  | -0.073573 |
| 25 | 6 | 0 | -0.707145 | 1.557067  | 0.065587  |
| 26 | 6 | 0 | -1.409545 | -3.261445 | -0.673136 |
| 27 | 1 | 0 | -2.226001 | -3.488899 | -1.365079 |
| 28 | 1 | 0 | -0.478587 | -3.259910 | -1.242305 |
| 29 | 1 | 0 | -1.366728 | -4.052865 | 0.083867  |
| 30 | 6 | 0 | 1.408729  | -3.257261 | 0.691475  |
| 31 | 1 | 0 | 0.477644  | -3.251888 | 1.260487  |
| 32 | 1 | 0 | 1.366259  | -4.054161 | -0.059757 |
| 33 | 1 | 0 | 2.225156  | -3.479424 | 1.385175  |
| 34 | 6 | 0 | 0.006315  | 4.975642  | 0.043467  |
| 35 | 1 | 0 | 0.112220  | 5.309653  | 1.081207  |
| 36 | 1 | 0 | 0.847643  | 5.342491  | -0.545336 |
| 37 | 1 | 0 | -0.936752 | 5.342065  | -0.363218 |

---

7

| Center<br>Number | Atomic<br>Number | Atomic<br>Type | Coordinates (Angstroms) |           |           |
|------------------|------------------|----------------|-------------------------|-----------|-----------|
|                  |                  |                | X                       | Y         | Z         |
| 1                | 7                | 0              | 1.135507                | 2.693608  | -0.103393 |
| 2                | 7                | 0              | -1.136592               | 2.694161  | 0.078510  |
| 3                | 7                | 0              | -0.001347               | 3.389079  | -0.024435 |
| 4                | 7                | 0              | 1.644300                | -2.074971 | 0.117016  |
| 5                | 7                | 0              | -1.644766               | -2.075456 | -0.106995 |
| 6                | 6                | 0              | 5.197268                | -1.076938 | 0.065142  |
| 7                | 1                | 0              | 6.267954                | -1.229642 | 0.083373  |
| 8                | 6                | 0              | -5.197626               | -1.076522 | -0.067000 |
| 9                | 1                | 0              | -6.268307               | -1.229133 | -0.086304 |
| 10               | 6                | 0              | 4.237103                | -2.046460 | 0.136396  |
| 11               | 1                | 0              | 4.471837                | -3.102079 | 0.226061  |
| 12               | 6                | 0              | -4.237536               | -2.046613 | -0.131142 |
| 13               | 1                | 0              | -4.472329               | -3.102698 | -0.214966 |
| 14               | 6                | 0              | -2.806455               | -0.134901 | 0.059195  |
| 15               | 6                | 0              | -2.915924               | -1.515020 | -0.057752 |
| 16               | 6                | 0              | -0.716521               | -1.030525 | -0.010550 |
| 17               | 6                | 0              | -1.431327               | 0.195580  | 0.065397  |
| 18               | 6                | 0              | 0.716073                | -1.030446 | 0.015964  |
| 19               | 6                | 0              | 1.430950                | 0.195115  | -0.068197 |
| 20               | 6                | 0              | 2.806042                | -0.135659 | -0.063112 |
| 21               | 6                | 0              | 2.915468                | -1.515077 | 0.061902  |
| 22               | 6                | 0              | 0.707189                | 1.418865  | -0.060156 |
| 23               | 6                | 0              | -0.707355               | 1.419204  | 0.054547  |
| 24               | 6                | 0              | -1.419101               | -3.405575 | -0.654244 |
| 25               | 1                | 0              | -2.241417               | -3.653618 | -1.331454 |
| 26               | 1                | 0              | -0.494177               | -3.417357 | -1.233372 |
| 27               | 1                | 0              | -1.366790               | -4.176705 | 0.122910  |
| 28               | 6                | 0              | 1.419514                | -3.401417 | 0.673562  |
| 29               | 1                | 0              | 0.494777                | -3.409656 | 1.253035  |
| 30               | 1                | 0              | 1.367272                | -4.177869 | -0.098277 |
| 31               | 1                | 0              | 2.242177                | -3.644468 | 1.352187  |
| 32               | 6                | 0              | 0.004565                | 4.837490  | 0.046095  |
| 33               | 1                | 0              | 0.090283                | 5.171807  | 1.085665  |

|    |    |   |           |          |           |
|----|----|---|-----------|----------|-----------|
| 34 | 1  | 0 | 0.856946  | 5.204878 | -0.526292 |
| 35 | 1  | 0 | -0.930344 | 5.204302 | -0.378766 |
| 36 | 34 | 0 | -4.485795 | 0.666386 | 0.098925  |
| 37 | 34 | 0 | 4.485456  | 0.665105 | -0.109954 |

P6

| Center<br>Number | Atomic<br>Number | Atomic<br>Type | Coordinates (Angstroms) |           |           |
|------------------|------------------|----------------|-------------------------|-----------|-----------|
|                  |                  |                | X                       | Y         | Z         |
| 1                | 7                | 0              | -4.748244               | 3.726213  | -0.278968 |
| 2                | 7                | 0              | -7.010957               | 3.735429  | -0.015107 |
| 3                | 7                | 0              | -5.881043               | 4.425276  | -0.183439 |
| 4                | 16               | 0              | -1.507516               | 1.621351  | -0.308804 |
| 5                | 16               | 0              | -10.250180              | 1.636414  | 0.180199  |
| 6                | 7                | 0              | -4.240823               | -1.042214 | 0.100165  |
| 7                | 7                | 0              | -7.514708               | -1.048193 | -0.032341 |
| 8                | 6                | 0              | -0.720834               | 0.038825  | -0.080372 |
| 9                | 6                | 0              | -11.035321              | 0.040407  | 0.071448  |
| 10               | 6                | 0              | -1.646483               | -0.981890 | 0.058131  |
| 11               | 1                | 0              | -1.364215               | -2.017834 | 0.207885  |
| 12               | 6                | 0              | -10.108685              | -0.986722 | 0.007637  |
| 13               | 1                | 0              | -10.389675              | -2.031282 | -0.064285 |
| 14               | 6                | 0              | -8.680490               | 0.894415  | 0.119416  |
| 15               | 6                | 0              | -8.783893               | -0.492579 | 0.044935  |
| 16               | 6                | 0              | -6.592072               | 0.007772  | -0.000095 |
| 17               | 6                | 0              | -7.309764               | 1.237330  | 0.064626  |
| 18               | 6                | 0              | -5.164184               | 0.007624  | -0.011296 |
| 19               | 6                | 0              | -4.447064               | 1.229476  | -0.166595 |
| 20               | 6                | 0              | -3.076224               | 0.884272  | -0.194822 |
| 21               | 6                | 0              | -2.971885               | -0.493292 | -0.017259 |
| 22               | 6                | 0              | -5.172916               | 2.454051  | -0.176119 |
| 23               | 6                | 0              | -6.584241               | 2.459783  | -0.011414 |
| 24               | 6                | 0              | -7.301692               | -2.384417 | -0.573540 |
| 25               | 1                | 0              | -8.131324               | -2.632575 | -1.242135 |
| 26               | 1                | 0              | -6.381292               | -2.404372 | -1.159107 |
| 27               | 1                | 0              | -7.247391               | -3.148595 | 0.209845  |
| 28               | 6                | 0              | -4.454025               | -2.337670 | 0.732520  |
| 29               | 1                | 0              | -5.374293               | -2.317261 | 1.318347  |
| 30               | 1                | 0              | -4.508621               | -3.153995 | 0.003630  |
| 31               | 1                | 0              | -3.624231               | -2.539298 | 1.416364  |
| 32               | 6                | 0              | -5.872820               | 5.875453  | -0.163483 |
| 33               | 1                | 0              | -5.749908               | 6.245182  | 0.860165  |
| 34               | 1                | 0              | -5.041568               | 6.221374  | -0.778663 |
| 35               | 1                | 0              | -6.822457               | 6.228043  | -0.567112 |
| 36               | 6                | 0              | 0.716795                | -0.053174 | -0.075147 |
| 37               | 16               | 0              | 1.505834                | -1.647475 | -0.180797 |
| 38               | 6                | 0              | 1.640967                | 0.976263  | -0.012561 |
| 39               | 6                | 0              | 3.073709                | -0.901607 | -0.120635 |
| 40               | 1                | 0              | 1.357503                | 2.020291  | 0.057354  |
| 41               | 6                | 0              | 2.966941                | 0.485242  | -0.048429 |
| 42               | 6                | 0              | 4.445237                | -1.241155 | -0.064697 |
| 43               | 7                | 0              | 4.234768                | 1.044072  | 0.028527  |
| 44               | 6                | 0              | 5.159924                | -0.009800 | -0.001507 |
| 45               | 6                | 0              | 5.173662                | -2.461748 | 0.013455  |

|    |    |   |           |           |           |
|----|----|---|-----------|-----------|-----------|
| 46 | 6  | 0 | 4.444189  | 2.381140  | 0.569184  |
| 47 | 6  | 0 | 6.587801  | -0.006171 | 0.010237  |
| 48 | 7  | 0 | 4.749991  | -3.738401 | 0.018921  |
| 49 | 6  | 0 | 6.584902  | -2.452382 | 0.178709  |
| 50 | 1  | 0 | 3.613852  | 2.627453  | 1.237591  |
| 51 | 1  | 0 | 5.364468  | 2.403786  | 1.154827  |
| 52 | 1  | 0 | 4.496603  | 3.145065  | -0.214573 |
| 53 | 7  | 0 | 7.508705  | 1.045595  | -0.102851 |
| 54 | 6  | 0 | 7.307819  | -1.226082 | 0.167621  |
| 55 | 7  | 0 | 5.881494  | -4.425290 | 0.188694  |
| 56 | 7  | 0 | 7.012578  | -3.723374 | 0.283596  |
| 57 | 6  | 0 | 8.778904  | 0.499958  | 0.015847  |
| 58 | 6  | 0 | 7.292411  | 2.340152  | -0.735856 |
| 59 | 6  | 0 | 8.677814  | -0.877572 | 0.195633  |
| 60 | 6  | 0 | 5.893202  | -5.875470 | 0.170982  |
| 61 | 6  | 0 | 10.103171 | 0.991609  | -0.059932 |
| 62 | 1  | 0 | 6.372573  | 2.317014  | -1.322276 |
| 63 | 1  | 0 | 7.235202  | 3.156688  | -0.007402 |
| 64 | 1  | 0 | 8.122107  | 2.543668  | -1.419250 |
| 65 | 16 | 0 | 10.248251 | -1.610694 | 0.311384  |
| 66 | 1  | 0 | 6.018809  | -6.246477 | -0.851877 |
| 67 | 1  | 0 | 6.724164  | -6.218542 | 0.788158  |
| 68 | 1  | 0 | 4.943674  | -6.229630 | 0.573474  |
| 69 | 6  | 0 | 11.031184 | -0.026673 | 0.080473  |
| 70 | 1  | 0 | 10.383082 | 2.027920  | -0.211559 |
| 71 | -2 | 0 | 23.503919 | 0.028375  | 0.004392  |

-----  
Lengths of translation vectors: 23.503937  
-----

**P7**

| Center<br>Number | Atomic<br>Number | Atomic<br>Type | Coordinates (Angstroms) |           |           |
|------------------|------------------|----------------|-------------------------|-----------|-----------|
|                  |                  |                | X                       | Y         | Z         |
| 1                | 7                | 0              | -4.796571               | 3.891524  | -0.066709 |
| 2                | 7                | 0              | -7.061229               | 3.887590  | 0.187599  |
| 3                | 7                | 0              | -5.930144               | 4.585386  | 0.060257  |
| 4                | 7                | 0              | -4.281817               | -0.881773 | 0.052144  |
| 5                | 7                | 0              | -7.574150               | -0.880153 | -0.064759 |
| 6                | 6                | 0              | -0.711354               | 0.102307  | -0.090802 |
| 7                | 6                | 0              | -11.145018              | 0.099504  | 0.097075  |
| 8                | 6                | 0              | -1.703621               | -0.855008 | -0.006315 |
| 9                | 1                | 0              | -1.474087               | -1.912535 | 0.079533  |
| 10               | 6                | 0              | -10.152571              | -0.855068 | -0.012520 |
| 11               | 1                | 0              | -10.382028              | -1.909603 | -0.129677 |
| 12               | 6                | 0              | -8.727139               | 1.059442  | 0.176147  |
| 13               | 6                | 0              | -8.841791               | -0.321770 | 0.038404  |
| 14               | 6                | 0              | -6.642416               | 0.162648  | 0.018672  |
| 15               | 6                | 0              | -7.357313               | 1.389512  | 0.139201  |
| 16               | 6                | 0              | -5.213672               | 0.163113  | 0.001524  |
| 17               | 6                | 0              | -4.499093               | 1.393024  | -0.084697 |
| 18               | 6                | 0              | -3.129372               | 1.064145  | -0.135949 |
| 19               | 6                | 0              | -3.014424               | -0.320458 | -0.038509 |
| 20               | 6                | 0              | -5.223262               | 2.616496  | -0.032389 |
| 21               | 6                | 0              | -6.633031               | 2.614008  | 0.127242  |

|    |    |   |            |           |           |
|----|----|---|------------|-----------|-----------|
| 22 | 6  | 0 | -7.369187  | -2.203568 | -0.637139 |
| 23 | 1  | 0 | -8.212593  | -2.439662 | -1.292174 |
| 24 | 1  | 0 | -6.462305  | -2.209369 | -1.243942 |
| 25 | 1  | 0 | -7.296367  | -2.984453 | 0.128195  |
| 26 | 6  | 0 | -4.484797  | -2.219405 | 0.591530  |
| 27 | 1  | 0 | -5.391344  | -2.241289 | 1.198419  |
| 28 | 1  | 0 | -4.557255  | -2.981007 | -0.193017 |
| 29 | 1  | 0 | -3.640762  | -2.470747 | 1.240071  |
| 30 | 6  | 0 | -5.921873  | 6.032311  | 0.156389  |
| 31 | 1  | 0 | -5.803117  | 6.348006  | 1.198517  |
| 32 | 1  | 0 | -5.088199  | 6.410185  | -0.436340 |
| 33 | 1  | 0 | -6.869736  | 6.406213  | -0.232001 |
| 34 | 34 | 0 | -10.403694 | 1.859505  | 0.290007  |
| 35 | 34 | 0 | -1.453041  | 1.867113  | -0.230959 |
| 36 | 6  | 0 | 0.709325   | -0.097284 | -0.095957 |
| 37 | 6  | 0 | 1.702155   | 0.856939  | 0.013253  |
| 38 | 34 | 0 | 1.449957   | -1.857574 | -0.288887 |
| 39 | 1  | 0 | 1.473125   | 1.911580  | 0.130297  |
| 40 | 6  | 0 | 3.012725   | 0.323146  | -0.037888 |
| 41 | 6  | 0 | 3.126830   | -1.058125 | -0.175459 |
| 42 | 7  | 0 | 4.280604   | 0.881093  | 0.064908  |
| 43 | 6  | 0 | 4.496542   | -1.388716 | -0.138684 |
| 44 | 6  | 0 | 5.211912   | -0.162104 | -0.018515 |
| 45 | 6  | 0 | 4.486164   | 2.204281  | 0.637653  |
| 46 | 6  | 0 | 5.220383   | -2.613472 | -0.126699 |
| 47 | 6  | 0 | 6.640653   | -0.163072 | -0.001696 |
| 48 | 1  | 0 | 3.643101   | 2.440408  | 1.293123  |
| 49 | 1  | 0 | 5.393306   | 2.209629  | 1.244067  |
| 50 | 1  | 0 | 4.558882   | 2.985388  | -0.127463 |
| 51 | 7  | 0 | 4.791720   | -3.886911 | -0.186790 |
| 52 | 6  | 0 | 6.630190   | -2.616441 | 0.032622  |
| 53 | 7  | 0 | 7.572851   | 0.881480  | -0.052654 |
| 54 | 6  | 0 | 7.354817   | -1.393224 | 0.084577  |
| 55 | 7  | 0 | 5.922582   | -4.585092 | -0.059610 |
| 56 | 7  | 0 | 7.056435   | -3.891617 | 0.066990  |
| 57 | 6  | 0 | 8.840070   | 0.319746  | 0.037770  |
| 58 | 6  | 0 | 7.370168   | 2.219189  | -0.591952 |
| 59 | 6  | 0 | 8.724663   | -1.064814 | 0.135374  |
| 60 | 6  | 0 | 5.930309   | -6.032033 | -0.155556 |
| 61 | 6  | 0 | 10.151053  | 0.853828  | 0.005169  |
| 62 | 1  | 0 | 6.463429   | 2.241406  | -1.198542 |
| 63 | 1  | 0 | 7.298239   | 2.980805  | 0.192630  |
| 64 | 1  | 0 | 8.214079   | 2.470243  | -1.240768 |
| 65 | 34 | 0 | 10.400733  | -1.868359 | 0.230029  |
| 66 | 1  | 0 | 6.048303   | -6.347901 | -1.197717 |
| 67 | 1  | 0 | 6.764235   | -6.410087 | 0.436699  |
| 68 | 1  | 0 | 4.982572   | -6.405588 | 0.233481  |
| 69 | 6  | 0 | 11.143001  | -0.103830 | 0.089502  |
| 70 | 1  | 0 | 10.380936  | 1.911264  | -0.080850 |
| 71 | -2 | 0 | 23.708769  | -0.004252 | -0.002805 |

---

Lengths of translation vectors: 23.708770

---
